# Supplementary material
Source: Springer Nature journal article supplement (https://www.springermedizin.de/resource/supplementary/12913_2013_2856_MOESM4_ESM.pdf/9531684)
Supplement: MOESM4 [file 9531684]

## Disabling condition

- Disease, illness, or other health problems
- Injuries
- Mental or emotional problems

## Body Functions and Structures

### ■ b/s Assessment

|      |        |        |      |      |
|------|--------|--------|------|------|
| b110 | b117   | b122   | b139 | b140 |
| b144 | b147   | b152   | b160 | b164 |
| b167 | b16701 | b16711 | b210 | b230 |
| b235 | b310   | b320   | b330 | s320 |
| s330 | s340   | b410   | b415 | b430 |
| b440 | s430   | b510   | s530 | s540 |
| s560 | b610   | b620   | b710 | b730 |
| b735 | b765   | s730   | s750 | s760 |
| b810 | b830   | s810   |      |      |

## Activities

### ■ FUNDES-Adult version Part d ( $\geq 18$ years) (86 items)

Domain 1: Cognition

Domain 2: Mobility

Domain 3: Self-care

Domain 4: Getting

along with others

Domain 5: Life activities

Domain 6: Participation

Domain 8: Motor action

### ■ FUNDES-Child version Participation Part: (6.0-17.9 years old) (40 items)

Domain 1: Home participation

Domain 2: Neighborhood and community participation

Domain 3: School participation

Domain 4: Home and community living activities

## Participation

## Environmental Factors

- FUNDES-Adult version e Part (8 items):  
e110 e115 e120 e125 e130 e165 e225 e570
- Child and Adolescent Scale of Environment (18 items)

## Personal Factors

Age, sex, pre-morbid disability, duration of disability, education level, expressed needs, and others.

1
